# Supplementary material for: Relative Abundance and Diversity of Bacterial Methanotrophs at the Oxic–Anoxic Interface of the Congo Deep-Sea Fan
Source: PubMed Central journal article supplement (PMC5403828; doi:10.3389/fmicb.2017.00715), 2017-04-25
Supplement: Table_1.pdf [file Table_1.pdf]

## *Supplementary Material*

# **Relative abundance and diversity of bacterial methanotrophs at the oxic-anoxic interface of the Congo deep-sea fan.**

**Sandrine BESSETTE, Yann MOALIC, Sébastien GAUTEY, Françoise LESONGEUR, Anne GODFROY, Laurent TOFFIN\***

**\*Correspondance:** Corresponding Author: [Laurent.Toffin@ifremer.fr](mailto:Laurent.Toffin@ifremer.fr)

## **1 Supplementary Data**

### **1.1 Geochemical analyses**

Pore-water analyses were performed on replicate sediment push-cores using Rhizon samplers and methane (CH<sub>4</sub>) concentrations were measured as described in (Vigneron et al., 2013). CH<sub>4</sub> fluxes at sediment-water interface were determined *in situ* by using a *Calmar* benthic incubation chamber (Caprais et al., 2010) deployed on almost every investigated habitats by the ROV Victor 6000 as described in (Khripounoff et al., 2015). Diffusive oxygen (O<sub>2</sub>) uptake and oxygen penetration depth (OPD) in the bottom water and in the sediment were measured *in situ* and analyzed as described in (Rabouille et al., 2009).

## 2 Supplementary Figures and Tables

### 2.1 Supplementary Figures

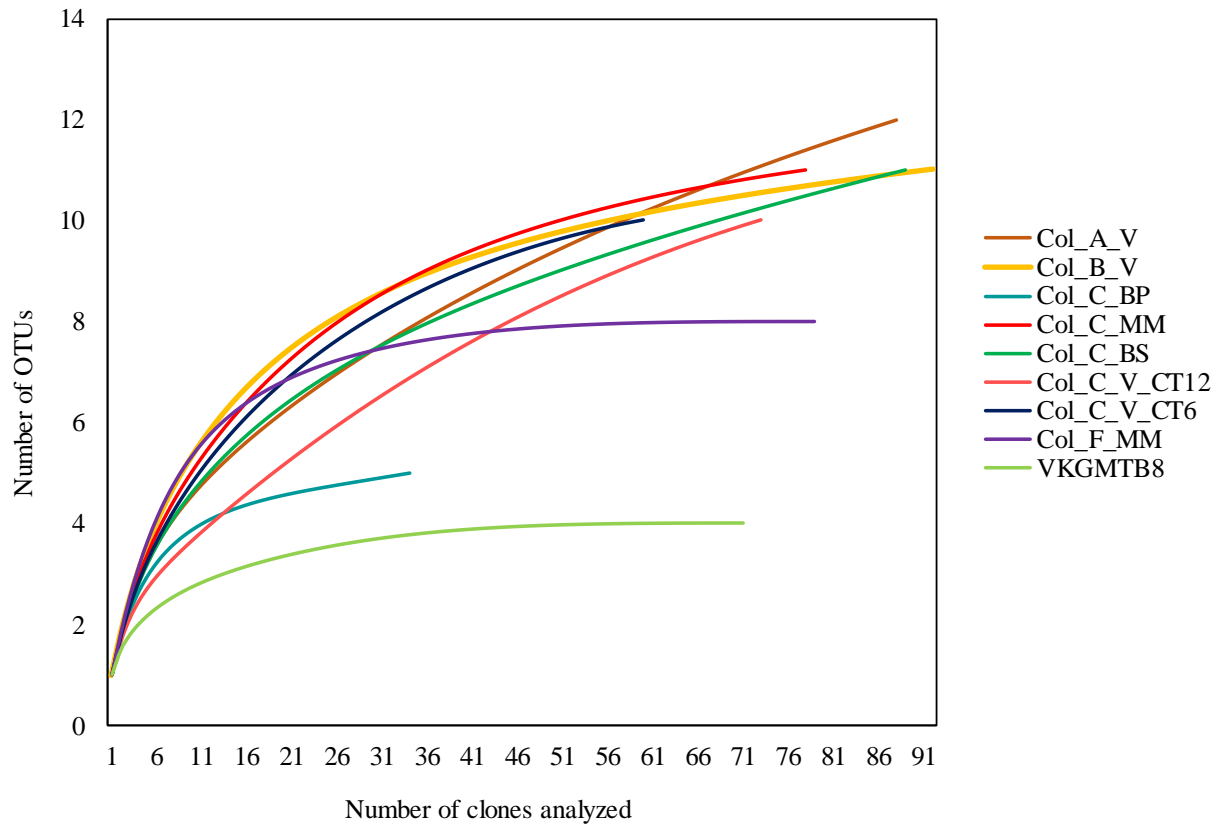

**Supplementary Figure 1:** Rarefaction curves for *pmoA* sequences clustered at 93% similarity in surface organic-rich and seep sediments of habitats in the Congo deep-sea fan (Col) and Haakon Mosby volcano (VKGMTB8) respectively. Samples are grouped color wise based on location.

**Supplementary Table 1:** Methane (CH<sub>4</sub>) concentration, CH<sub>4</sub> efflux, diffusive oxygen uptake (DOU) and oxygen penetration depth (OPD) at sediment-water interface of different organic-rich sedimentary habitats of the Congo deep-sea fan. <sup>(a)</sup> data from (Pastor et al., 2017), <sup>(b)</sup> data from (Khripounoff et al., 2016), <sup>(c)</sup> data from this study and <sup>(d)</sup> (Pozzato et al., Submitted). Abbreviations: PL: Dive number; CT: Push-cores number, Col: Congo lobe. V: Vesicomys habitats; BP: Black patch sediment; BS: Brown sediment; MM: Microbial mat habitats. NA: Not assessed during the Congolobe cruise.

| Sites  | Sample name  | <i>Ex situ</i> CH <sub>4</sub> concentration (μM) <sup>a</sup> | <i>In situ</i> CH <sub>4</sub> efflux (mmol m <sup>-2</sup> d <sup>-1</sup> ) | <i>In situ</i> DOU (mmol m <sup>-2</sup> d <sup>-1</sup> ) <sup>d</sup> | <i>Ex situ</i> OPD (mm) <sup>d</sup> |
|--------|--------------|----------------------------------------------------------------|-------------------------------------------------------------------------------|-------------------------------------------------------------------------|--------------------------------------|
| site A | Col_A_V      | 3.2                                                            | 108.5 <sup>b</sup>                                                            | 20.5                                                                    | 0.8                                  |
| site F | Col_F_MM     | 143.6                                                          | 208.8                                                                         | 9.9                                                                     | 3.9                                  |
| site C | Col_C_MM     | 5.3                                                            | NA                                                                            | 11.5                                                                    | 1.56                                 |
|        | Col_C_BP     | 124.7                                                          | 94 <sup>c</sup>                                                               | 20.7                                                                    | 1.3                                  |
|        | Col_C_V_CT6  | 7.1                                                            | NA                                                                            | 19.4                                                                    | 1.6                                  |
|        | Col_C_V_CT12 | NA                                                             | NA                                                                            | 8.3                                                                     | 2.2                                  |
|        | Col_C_BS     | 0.2                                                            | 2.4 <sup>c</sup>                                                              | 2.6                                                                     | 11                                   |
| site B | Col_B_V      | <0.1                                                           | 8.4 <sup>b</sup>                                                              | 2.8                                                                     | 9.4                                  |
| site E | Col_E_BS     | <0.1                                                           | 0.0 <sup>c</sup>                                                              | 1.4                                                                     | 66.5                                 |

**Supplementary Table 2: List of FISH probes used in this study.**

| Name               | Target group           | Sequence (5'- 3')          | reference              |
|--------------------|------------------------|----------------------------|------------------------|
| Eub338-Alexa       | Most of Bacteria       | GCT-GCC-TCC-CGT-AGG-AGT    | (Amann et al., 1990)   |
| MTMC701-Cy3        | <i>Methylococcales</i> | GTG TTC CTT CAG ATC TCT    | (Boetius et al., 2000) |
| M $\gamma$ 84-Cy3  | Type I MOB             | CCA-CTC-GTC-AGC-GCC-CGA    | (Eller et al., 2001)   |
| M $\gamma$ 705-Cy3 | Type I MOB             | CTG-GTG-TTC-CTT-CAG-ATC    | (Eller et al., 2001)   |
| M $\alpha$ 450-Cy3 | Type II MOB            | ATC-CAG-GTA-CCG-TCA-TTA-TC | (Eller et al., 2001)   |

### 3 References

- Amann, R.I., Krumholz, L., and Stahl, D.A. (1990). Fluorescent-oligonucleotide probing of whole cells for determinative phylogenetic and environmental studies in microbiology. *J. Bacteriol.* 172, 762-770.
- Boetius, A., Ravensschlag, K., Schubert, C.J., Rickert, D., Widdel, F., Gieseke, A., Amann, R., Jorgensen, B.B., Witte, U., and Pfannkuche, O. (2000). A marine microbial consortium apparently mediating anaerobic oxidation of methane. *Nature* 407, 623-626. doi: 10.1038/35036572.
- Caprais, J.-C., Lanteri, N., Crassous, P., Noel, P., Bignon, L., Rousseaux, P., Pignet, P., and Khripounoff, A. (2010). A new CALMAR benthic chamber operating by submersible: First application in the cold-seep environment of Napoli mud volcano (Mediterranean Sea). *Limnology and Oceanography: Methods* 8, 304-312. doi: 10.4319/lom.2010.8.304.
- Eller, G., Stubner, S., and Frenzel, P. (2001). Group-specific 16S rRNA targeted probes for the detection of type I and type II methanotrophs by fluorescence in situ hybridisation. *FEMS Microbiology Letters* 198, 91-97. doi: 10.1111/j.1574-6968.2001.tb10624.x.
- Khripounoff, A., Caprais, J.C., Decker, C., Essirard, M., Le Bruchec, J., Noel, P., and Olu, K. (2015). Variability in gas and solute fluxes through deep-sea chemosynthetic ecosystems inhabited by vesicomyid bivalves in the Gulf of Guinea. *Deep Sea Research Part I: Oceanographic Research Papers* 95, 122-130. doi: 10.1016/j.dsr.2014.10.013.
- Khripounoff, A., Caprais, J.C., Decker, C., Le Bruchec, J., Noel, P., and Husson, B. (2016). Respiration of bivalves from three different deep-sea areas: cold seeps, hydrothermal vents and organic carbon-rich sediments. *Deep Sea Research Part II: Topical Studies in Oceanography*, in press. doi: 10.1016/j.dsr2.2016.05.023.
- Pastor, L., Toffin, L., Decker, C., Olu, K., Cathalot, C., Lesongeur, F., Caprais, J.C., Bessette, S., Brandily, C., Taillefert, M., and Rabouille, C. (2017). Early diagenesis in the sediments of the Congo deep-sea fan dominated by massive terrigenous deposits: Part III – Sulfate- and methane- based microbial processes. *Deep Sea Research Part II: Topical Studies in Oceanography*. doi: 10.1016/j.dsr2.2017.03.011.
- Pozzato, L., Cathalot, C., Berrached, C., Toussaint, F., Stetten, E., Caprais, J.C., Pastor, L., Olu, K., and Rabouille, C. (Submitted). Early diagenesis in the Congo deep-sea fan sediments

dominated by massive terrigenous deposits: Part I - Oxygen consumption and organic carbon mineralization using a micro-electrode approach. *Deep Sea Research Part II: Topical Studies in Oceanography*.

Rabouille, C., Caprais, J.C., Lansard, B., Crassous, P., Dedieu, K., Reyss, J.L., and Khripounoff, A. (2009). Organic matter budget in the Southeast Atlantic continental margin close to the Congo Canyon: In situ measurements of sediment oxygen consumption. *Deep Sea Research Part II: Topical Studies in Oceanography* 56, 2223-2238. doi: 10.1016/j.dsr2.2009.04.005.

Vigneron, A., Cruaud, P., Pignet, P., Caprais, J.-C., Cambon-Bonavita, M.-A., Godfroy, A., and Toffin, L. (2013). Archaeal and anaerobic methane oxidizer communities in the Sonora Margin cold seeps, Guaymas Basin (Gulf of California). *ISME J* 7, 1595-1608. doi: 10.1038/ismej.2013.18.
